# Supplementary material for: Lectin from Sambucus sieboldiana abrogates the anoikis resistance of colon cancer cells conferred by N-acetylglucosaminyltransferase V during hematogenous metastasis
Source: PubMed Central journal article supplement (PMC5522063; doi:10.18632/oncotarget.15034), 2017-02-02
Supplement: oncotarget-08-42238-s001.pdf [file oncotarget-08-42238-s001.pdf]

# Lectin from *Sambucus sieboldiana* abrogates the anoikis resistance of colon cancer cells conferred by N-acetylglucosaminyltransferase V during hematogenous metastasis

## SUPPLEMENTARY MATERIALS

| Symbol  | Structure | Symbol  | Structure | Symbol  | Structure | Symbol  | Structure |
|---------|-----------|---------|-----------|---------|-----------|---------|-----------|
| 3_3_0_0 |           | 5_4_0_1 |           | 6_5_0_2 |           | 7_6_0_3 |           |
| 3_3_1_0 |           | 5_4_0_2 |           | 6_5_0_3 |           | 7_6_0_4 |           |
| 3_4_0_0 |           | 5_4_1_0 |           | 6_5_1_0 |           | 7_6_1_0 |           |
| 3_4_1_0 |           | 5_4_1_1 |           | 6_5_1_1 |           | 7_6_1_1 |           |
| 3_5_0_0 |           | 5_4_1_2 |           | 6_5_1_2 |           | 7_6_1_2 |           |
| 3_5_1_0 |           | 5_5_0_0 |           | 6_5_1_3 |           | 7_6_1_3 |           |
| 3_6_0_0 |           | 5_5_0_1 |           | 6_6_0_0 |           | 7_6_1_4 |           |
| 3_6_1_0 |           | 5_5_0_2 |           | 6_6_0_1 |           | 8_7_0_0 |           |
| 4_4_0_0 |           | 5_5_1_1 |           | 6_6_0_2 |           | 8_7_0_1 |           |
| 4_4_0_1 |           | 5_5_1_2 |           | 6_6_0_3 |           | 8_7_0_2 |           |
| 4_4_1_0 |           | 6_4_0_0 |           | 6_6_1_0 |           | 8_7_0_3 |           |
| 4_4_1_1 |           | 6_4_0_1 |           | 6_6_1_1 |           | 8_7_0_4 |           |
| 4_5_0_0 |           | 6_4_0_2 |           | 6_6_1_2 |           | 8_7_1_0 |           |
| 4_5_0_1 |           | 6_4_1_1 |           | 6_6_1_3 |           | 8_7_1_1 |           |
| 4_5_1_0 |           | 6_4_1_2 |           | 7_6_0_0 |           | 8_7_1_2 |           |
| 4_5_1_1 |           | 6_5_0_0 |           | 7_6_0_1 |           | 8_7_1_3 |           |
| 5_4_0_0 |           | 6_5_0_1 |           | 7_6_0_2 |           | 8_7_1_4 |           |

**Supplementary Figure 1: Identified N-glycan structures with symbols.** ■, N-acetylglucosamine; ●, mannose; ▼, fucose; ●, galactose; ◆, N-acetylneuraminic acid.

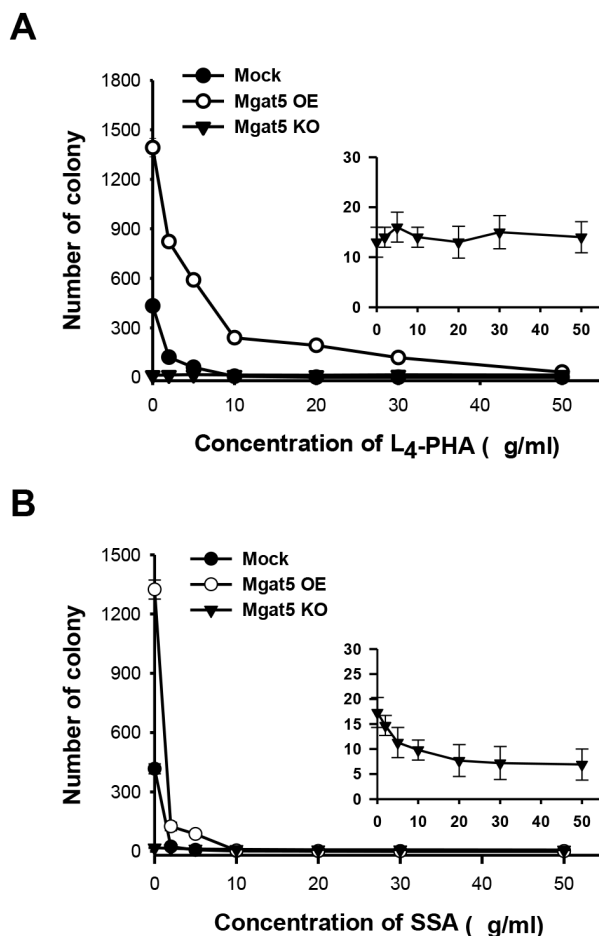

**Supplementary Figure 2: Dependence of anoikis sensitivity on the concentration of L<sub>4</sub>-PHA and SSA.** HT-29 mock, Mgat5 overexpression transfectant (OE), and Mgat5 knock-out (KO) cells were exposed to anoikis stress for 48 hours in the presence of indicated concentration of L<sub>4</sub>-PHA **A.** and SSA **B.** Cells were allowed to grow on culture plates for 3 days and the number of colony was counted on a microscope (X100). The average number of colony was compared between the HT-29 derivative cells. Inset shows the number of colony for Mga5 KO cells. The treatment L4-PHA did not affect the anoikis sensitivity, indicating that L<sub>4</sub>-PHA binding and anoikis interference was specific to  $\beta$ 1,6-GlcNAc branching. SSA treatment was slightly effective even for Mgat5 KO cells, which may suggest that sialic acids on N-glycan branches other than the  $\beta$ 1,6-GlcNAc branch, albeit minutely, contribute to anoikis resistance.

**Supplementary Table 1: Lists of genes correlated to anoikis resistance.**

**See Supplementary File 1**

**Supplementary Table 2: Clinical information of colon cancer patients.**

**See Supplementary File 2**
